# Supplementary material
Source: Springer Nature journal article supplement (https://www.springermedizin.de/resource/supplementary/13018_2009_184_MOESM2_ESM.pdf/9636496)
Supplement: MOESM2 [file 9636496]

# Functional Rating System for Clubfoot Surgery

Date: \_\_\_\_\_

Patient: \_\_\_\_\_

Date of Birth: \_\_\_\_\_

Sex: Male / Female      MR #: \_\_\_\_\_

Clubfoot Side/Type: \_\_\_\_\_

Right \_\_\_\_\_ Left \_\_\_\_\_

## FIRST SURGICAL INTERVENTION

Date: \_\_\_\_\_

By: \_\_\_\_\_

Type of Surgery: \_\_\_\_\_

Special Findings: \_\_\_\_\_

## REVISION SURGERY

Date: \_\_\_\_\_

By: \_\_\_\_\_

Type of Surgery: \_\_\_\_\_

Special Findings: \_\_\_\_\_

**TOTAL SCORE:** \_\_\_\_\_

| Points   | Rating    |
|----------|-----------|
| 85 - 100 | Excellent |
| 70 - 84  | Good      |
| 60 - 69  | Fair      |
| ≤59      | Poor      |

| Category                                         | Points |
|--------------------------------------------------|--------|
| <b>1. Ankle motion (passive)</b>                 |        |
| *Arc from neutral $\geq 20^\circ$                | 15     |
| Arc from neutral $> 10^\circ$                    | 5      |
| Arc from neutral $0-10^\circ$                    | 0      |
| <b>2. Subtalar Joint Motion (passive motion)</b> |        |
| $\geq 15^\circ$                                  | 10     |
| $< 15^\circ$                                     | 5      |
| Stiff                                            | 0      |
| <b>3. Position of Heel When Standing</b>         |        |
| $0^\circ-5^\circ$ Valgus                         | 10     |
| $> 5^\circ$ Valgus                               | 5      |
| Varus                                            | 0      |
| <b>4. Forefoot (appearance)</b>                  |        |
| Neutral                                          | 10     |
| $\leq 5^\circ$ Adduction/Abduction               | 5      |
| $> 5^\circ$ Adduction/Abduction                  | 0      |
| <b>5. Gait</b>                                   |        |
| Normal heel-toe gait                             | 10     |
| Cannot heel walk                                 | 6      |
| Cannot toe walk                                  | 6      |
| Flatfoot gait                                    | 5      |
| <b>6. Radiographic Measurement</b>               |        |
| <b>**Talocalcaneal Index</b>                     |        |
| $\geq 40^\circ$                                  | 5      |
| $< 40^\circ$                                     | 0      |
| <b>Talar-First Metatarsal Angle</b>              |        |
| $\leq 10^\circ$                                  | 5      |
| $> 10^\circ$                                     | 0      |
| <b>7. Shoes</b>                                  |        |
| Regular (no complaints)                          | 5      |
| Regular (with complaints)                        | 3      |
| Orthopaedic Shoes/<br>Inserts/Braces             | 0      |
| <b>8. Function</b>                               |        |
| Not limited                                      | 15     |
| Occasionally limited                             | 8      |
| Usually limited                                  | 0      |
| <b>9. Pain</b>                                   |        |
| Never                                            | 10     |
| Occasionally                                     | 5      |
| Usually                                          | 0      |
| <b>10. Flexor Tendons</b>                        |        |
| Full function                                    | 5      |
| Partial function                                 | 2      |
| No function                                      | 0      |

\* Arc starting from neutral  $90^\circ$

\*\* The *talocalcaneal index* is the sum of the talocalcaneal angles measured on lateral and anteroposterior radiographs.
